# Supplementary material for: Optimization of the GAFF force field to describe liquid crystal molecules: the path to a dramatic improvement in transition temperature predictions
Source: Royal Society of Chemistry journal article supplement (doi:10.1039/c5cp03702f), 2015-01-01
Supplement: c5cp03702f1.pdf [file c5cp03702f1.pdf]

---

## Supplementary Information

# Optimisation of the GAFF Force Field to Describe Liquid Crystal Molecules: The Path to a Dramatic Improvement in Transition Temperature Predictions

Nicola Jane Boyd and Mark R. Wilson\*

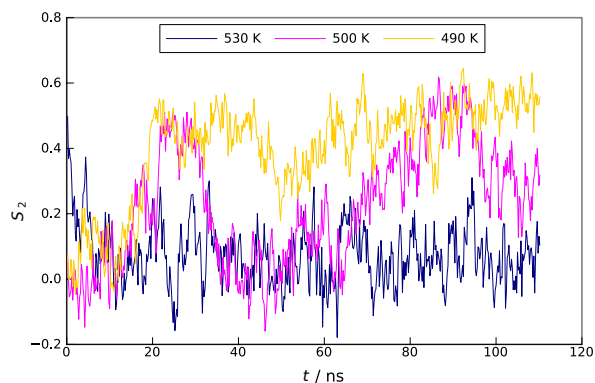

**Fig. 1** The time dependence of the orientational order parameter at different temperatures for the GAFF force field using the original GAFF Lennard-Jones potentials and the new torsional parameters from this study.

### References

- 1 C. Caleman, P. J. van Maaren, M. Hong, J. S. Hub, L. T. Costa and D. van der Spoel, *J. Chem. Theory Comp.*, 2012, **8**, 61–74.
- 2 J. Wang and T. Hou, *J. Chem. Theory Comp.*, 2011, **7**, 2151–2165.

---

Department of Chemistry, Durham University, South Road, Durham, DH1 3LE, United Kingdom. *k*

\* Author for correspondence. E-mail: mark.wilson@durham.ac.uk

---

**Table 1** List of the experimental densities and heats of vaporization used to assess GAFF for liquid crystal fragment molecules. (Data taken from Caleman et al.<sup>1</sup> and <sup>a</sup> from Wang & Hou.<sup>2</sup>.)

| Molecule                      | Property                      | T(K)   | Experiment | GAFF            | % Diff. |
|-------------------------------|-------------------------------|--------|------------|-----------------|---------|
| Methanoic acid                | Density (g/cm <sup>3</sup> )  | 293.15 | 1.2200     | 1.3971± 0.0005  | +14.5   |
|                               | Heat of Vaporization (kJ/mol) | 293.15 | 19.82      | 68.74 ± 0.06    | +246.8  |
| Acetic acid <sup>a</sup>      | Density (g/cm <sup>3</sup> )  | 298    | 1.0446     | 1.1200          | +7.2    |
|                               | Heat of Vaporization (kJ/mol) | 298    | 51.59      | 56.00           | +8.6    |
| Propanoic acid <sup>a</sup>   | Density (g/cm <sup>3</sup> )  | 298    | 0.9882     | 1.026           | +3.8    |
|                               | Heat of Vaporization (kJ/mol) | 298    | 55.02      | 60.34           | +9.7    |
| Methyl formate                | Density (g/cm <sup>3</sup> )  | 293.15 | 0.9713     | 1.0512 ± 0.0002 | +8.0    |
|                               | Heat of Vaporization (kJ/mol) | 293.15 | 28.85      | 38.68 ± 0.03    | +34.1   |
| Methylacetate                 | Density (g/cm <sup>3</sup> )  | 293.15 | 0.9342     | 0.9714 ± 0.0002 | +4.0    |
|                               | Heat of Vaporization (kJ/mol) | 293.15 | 32.67      | 41.57± 0.07     | +27.2   |
| Ethenyl acetate               | Density (g/cm <sup>3</sup> )  | 298.15 | 0.9256     | 0.9790 ± 0.0001 | +5.3    |
|                               | Heat of Vaporization (kJ/mol) | 298.15 | 34.58      | 43.40 ± 0.02    | +25.5   |
| Diethyl carbonate             | Density (g/cm <sup>3</sup> )  | 298.15 | 0.9691     | 1.0209 ± 0.0002 | +5.3    |
|                               | Heat of Vaporization (kJ/mol) | 298.15 | 41.1       | 60.79 ± 0.09    | +47.9   |
| Methyl benzoate               | Density (g/cm <sup>3</sup> )  | 298.15 | 1.0840     | 1.1113 ± 0.0002 | +2.5    |
|                               | Heat of Vaporization (kJ/mol) | 298.15 | 55.57      | 64.21 ± 0.03    | +15.6   |
| <b>Heterocyclic compounds</b> |                               |        |            |                 |         |
| 1-H -pyrrole                  | Density (g/cm <sup>3</sup> )  | 293.15 | 0.9698     | 1.0201± 0.0003  | + 5.2   |
|                               | Heat of Vaporization (kJ/mol) | 293.15 | 45.7       | 52.93 ± 0.05    | +15.8   |
| 1,3-dioxolane                 | Density (g/cm <sup>3</sup> )  | 293.15 | 1.0600     | 1.1223 ± 0.0002 | +5.9    |
|                               | Heat of Vaporization (kJ/mol) | 293.15 | 35.80      | 43.45 ± 0.02    | +21.4   |
| Morpholine                    | Density (g/cm <sup>3</sup> )  | 293.15 | 1.0005     | 1.0880 ± 0.0003 | + 8.8   |
|                               | Heat of Vaporization (kJ/mol) | 293.15 | 45.32      | 59.56 ± 0.40    | +31.4   |
| Pyrimidine                    | Density (g/cm <sup>3</sup> )  | 298.15 | 1.0164     | 1.1160 ± 0.0003 | + 9.8   |
|                               | Heat of Vaporization (kJ/mol) | 298.15 | 49.81      | 50.47± 0.03     | +1.3    |
| Furan                         | Density (g/cm <sup>3</sup> )  | 298.15 | 0.9313     | 0.9660 ± 0.0002 | +3.7    |
|                               | Heat of Vaporization (kJ/mol) | 298.15 | 27.46      | 30.33 ± 0.03    | +10.5   |

**Table 2** Comparison of ACD Labs calculated densities and experimental values for small aromatic compounds.

| Molecule      | ACD(Labs-software) / g cm <sup>-3</sup> (293 K) | Exp. / g cm <sup>-3</sup> (293 K) | % error |
|---------------|-------------------------------------------------|-----------------------------------|---------|
| Phenylacetate | 1.071 ± 0.06                                    | 1.0739                            | -0.27   |
| Butylbenzene  | 0.864 ± 0.06                                    | 0.8670                            | -0.34   |
| Furan         | 0.942 ± 0.06                                    | 0.9403                            | +0.18   |
| Benzene       | 0.873 ± 0.06                                    | 0.8790                            | -0.68   |
| m-cresol      | 1.038 ± 0.06                                    | 1.0338                            | +0.41   |
